# Supplementary material for: The Legacy of Hg Contamination in a Past Mining Area (Tuscany, Italy): Hg Speciation and Health Risk Assessment
Source: MDPI journal article supplement (doi:10.3390/toxics12060436), 2024-06-16
Supplement: s1 [file s1]

## Sheet: Table S1
Table S1. The mercury concentration (mg/kg) during the three sampling campaings.
	Id	Lat	Lon	Hgtot
			Depth	0-30 cm	30-50 cm
2000 sampling	T1	43.3499	10.7934	27.1	-
	T2	43.3514	10.7933	19.8	-
	T3	43.3497	10.7962	0.3	-
	T4	43.3506	10.7941	0.13	-
	T5	43.3506	10.7935	3.3	-
	T6	43.351	10.7934	5.3	-
	T7	43.3517	10.7934	7.7	-
	T8	43.352	10.7934	46.9	-
	T9	43.3522	10.7932	35.4	-
	T10	43.3519	10.7934	22.3	-
	T11	43.352	10.7926	67.8	-
	T12	43.3529	10.7933	1.3	-
	T13	43.3508	10.7954	319.3	-
	T15	43.3512	10.7953	5	-
	T16	43.3525	10.7952	0.83	-
	T17	43.3526	10.7955	31	-
	T18	43.3521	10.7929	333.7	-
	T19	43.3518	10.7934	64.1	-
	T20	43.3528	10.7931	44.9	-
	T21	43.3527	10.7933	18.7	-
	T22	43.3525	10.7935	35.8	-
	T23	43.3523	10.7937	21	-
2009 sampling	T1	43.3499	10.7934	0.1	0.1
	T2	43.3514	10.7933	0.1	0.1
	T3	43.3497	10.7962	0.1	0.2
	T4	43.3506	10.7941	0.1	0.1
	T5	43.3506	10.7935	0.4	0.1
	T6	43.351	10.7934	0.1	0.1
	T7	43.3517	10.7934	0.7	0.4
	T8	43.352	10.7934	0.8	1.7
	T9	43.3522	10.7932	0.6	4.4
	T10	43.3519	10.7934	17.8	0.6
	T11	43.352	10.7926	0.1	0.1
	T12	43.3529	10.7933	0.1	0.1
	T13	43.3508	10.7954	14.9	5.8
	T15	43.3512	10.7953	0.5	2
	T16	43.3525	10.7952	0.1	0.9
	T17	43.3526	10.7955	0.2	0.1
	T18	43.3521	10.7929	0.2	0.1
	T19	43.3518	10.7934	40.9	0.6
	T20	43.3528	10.7931	0.2	0.1
	T21	43.3527	10.7933	0.7	3.1
	T22	43.3525	10.7935	7.5	1.4
	T23	43.3523	10.7937	15.1	0.1
	T24	43.3531	10.7944	0.6	1.7
	T25	43.3533	10.795	0.1	0.2
	T26	43.3528	10.7938	3	0.1
	T27	43.353	10.7942	38.4	0.1
	T28	43.353	10.7948	1	0.2
	T29	43.3531	10.7953	0.4	0.1
	T30	43.3527	10.7928	0.2	0.1
	T31	43.3524	10.7926	0.2	0.1
	T32	43.3525	10.793	0.1	0.1
	T33	43.3528	10.7941	2.4	0.4
	T34	43.3525	10.796	0.1	0.1
	T35	43.352	10.7924	3.6	0.1
	T36	43.3518	10.7927	0.1	0.3
	T38	43.3521	10.7955	0.3	0.1
	T39	43.3522	10.7963	0.2	0.2
	T40	43.3515	10.7926	0.1	0.1
	T42	43.3517	10.7956	0.2	0.1
	T43	43.3518	10.7963	258	8.1
	T44	43.351	10.7927	0.1	0.1
	T45	43.3511	10.794	0.2	0.1
	T46	43.3512	10.7944	0.1	0.1
	T47	43.3513	10.7959	0.4	0.8
	T48	43.3513	10.7964	0.5	0.1
	T49	43.3503	10.7926	0.1	0.1
	T50	43.3503	10.7934	0.1	2.3
	T51	43.3507	10.7945	0.2	0.1
	T52	43.3505	10.7949	0.4	0.1
	T53	43.3506	10.7961	0.1	0.1
	T54	43.3506	10.7965	0.2	0.2
	T55	43.3503	10.7958	0.2	0.1
	T56	43.3501	10.796	0.1	0.1
2023 Sampling	A1.1	43.3527	10.7929	4.5	-
	A1.2	43.3526	10.7931	23.3	-
	A1.2b	43.3527	10.7931	25.5	-
	A1.3	43.3525	10.7929	0.2	-
	A1.4	43.3524	10.7932	2.5	-
	A1.5	43.3523	10.7928	0.1	-
	A1.6	43.3522	10.7932	3.6	-
	A1.7	43.3521	10.7928	0.1	-
	A1.8	43.352	10.7932	0.1	-
	A1.9	43.352	10.7935	<0.1	-
	A1.10	43.3519	10.7927	0.2	-
	A1.11	43.3518	10.7932	0.4	-
	A1.12	43.3518	10.7935	1.9	-
	A1.13	43.3517	10.7927	0.5	-
	A1.14	43.3517	10.7931	<0.1	-
	A1.15	43.3516	10.7935	0.1	-
	A2.1	43.3506	10.7952	0.2	-
	A2.2	43.3511	10.795	0.2	-
	A3.1	43.351	10.7948	0.2	-
	A3.2	43.3506	10.795	0.2	-
	A4.1	43.3517	10.7959	2.1	-
	A4.2	43.3516	10.7959	0.1	-
	A4.3	43.3515	10.7957	0.2	-
	A5.1	43.3528	10.7937	0.2	-
	A5.2	43.3528	10.7935	0.2	-
	A5.3	43.353	10.794	0.2	-
